# Supplementary material for: Species Composition and Diversity of Plants along Human-Induced Disturbances in Tropical Moist Sal Forests of Eastern Ghats, India
Source: MDPI journal article supplement (doi:10.3390/f14101931), 2023-09-22
Supplement: s1 [file s1]

# Supplementary Materials

**Table S1.** Density, basal area, important value index and regeneration status of trees in the three selected forest types Eastern Ghats, India.

| Botanical Name                                         | Family           | Density<br>(Trees ha <sup>-1</sup> ) | Basal Area<br>(m <sup>2</sup> ha <sup>-1</sup> ) | IVI    | Saplings<br>ha <sup>-1</sup> | Seedlings ha <sup>-1</sup> | Regeneration<br>status |
|--------------------------------------------------------|------------------|--------------------------------------|--------------------------------------------------|--------|------------------------------|----------------------------|------------------------|
| Pure Sal Forest (Un-disturbed)                         |                  |                                      |                                                  |        |                              |                            |                        |
| <i>Shorea robusta</i> Roth                             | Dipterocarpaceae | 387.50                               | 23.43                                            | 151.19 | 558                          | 65000                      | Good                   |
| <i>Madhuca latifolia</i> (Roxb.) A.Chev.               | Sapotaceae       | 37.50                                | 1.93                                             | 23.84  | 33                           | 6875                       | Fair                   |
| <i>Cleistanthus collinus</i> (Roxb.) Benth. ex Hook.f. | Phyllanthaceae   | 45.00                                | 0.79                                             | 21.25  | 185                          | 4375                       | Good                   |
| <i>Pterocarpus marsupium</i> Roxb.                     | Fabaceae         | 35.00                                | 1.61                                             | 19.52  | 3                            | 4375                       | Fair                   |
| <i>Terminalia alata</i> Heyne ex Roth                  | Combretaceae     | 22.50                                | 0.53                                             | 13.92  | 48                           | 5625                       | Good                   |
| Remaining 8 species                                    |                  | 97.50                                | 1.84                                             | 70.30  | 348                          | 98125                      | -                      |
| All species                                            |                  | 625                                  | 30.12                                            | 300    | 1175                         | 184375                     | -                      |
| Pure Sal Forest (Low disturbed)                        |                  |                                      |                                                  |        |                              |                            |                        |
| <i>Shorea robusta</i> Roth                             | Dipterocarpaceae | 395.00                               | 13.92                                            | 167.29 | 580                          | 43125                      | Good                   |
| <i>Terminalia alata</i> Heyne ex Roth                  | Combretaceae     | 30.00                                | 0.89                                             | 23.54  | 28                           | 3125                       | Good                   |
| <i>Lannea coromandelica</i> (Houtt.) Merr.             | Anacardiaceae    | 15.00                                | 2.20                                             | 23.25  | 0                            | 625                        | Fair                   |
| <i>Buchanania lanzan</i> Spreng.                       | Anacardiaceae    | 15.00                                | 0.34                                             | 13.36  | 73                           | 1875                       | Good                   |
| <i>Desmodium oojeinensis</i> (Roxb.)                   | Fabaceae         | 15.00                                | 0.28                                             | 13.09  | 13                           | 0                          | Poor                   |
| Remaining 5 species                                    |                  | 50.00                                | 1.20                                             | 59.46  | 249                          | 49375                      | -                      |
| All species                                            |                  | 520                                  | 18.82                                            | 300    | 943                          | 98125                      | -                      |
| Pure Sal Forest (Moderately disturbed)                 |                  |                                      |                                                  |        |                              |                            |                        |
| <i>Shorea robusta</i> Roth                             | Dipterocarpaceae | 412.50                               | 15.27                                            | 192.54 | 483                          | 30625                      | Good                   |
| <i>Vateria indica</i> L.                               | Dipterocarpaceae | 30.00                                | 0.48                                             | 25.67  | 20                           | 0                          | Poor                   |
| <i>Semecarpus anacardium</i> L. f.                     | Anacardiaceae    | 12.50                                | 0.24                                             | 20.64  | 10                           | 0                          | Poor                   |
| <i>Terminalia bellirica</i> (Gaertn.) Roxb.            | Combretaceae     | 7.50                                 | 0.25                                             | 15.50  | 0                            | 0                          | None                   |
| <i>Buchanania lanzan</i> Spreng.                       | Anacardiaceae    | 7.50                                 | 0.16                                             | 15.00  | 18                           | 1875                       | Good                   |
| Remaining species                                      |                  | 20.00                                | 0.26                                             | 30.64  | 197                          | 26875                      | -                      |
| All species                                            |                  | 490                                  | 16.66                                            | 300    | 728                          | 59375                      | -                      |
| Sal Dominated Moist Deciduous Forest (Un-disturbed)    |                  |                                      |                                                  |        |                              |                            |                        |
| <i>Shorea robusta</i> Roth                             | Dipterocarpaceae | 272.50                               | 11.49                                            | 94.31  | 478                          | 75625                      | Good                   |
| <i>Cleistanthus collinus</i> (Roxb.) Benth. ex Hook.f. | Phyllanthaceae   | 63.75                                | 0.81                                             | 17.46  | 98                           | 8750                       | Good                   |

|                                                              |                  |        |        |        |      |        |      |
|--------------------------------------------------------------|------------------|--------|--------|--------|------|--------|------|
| <i>Buchanania lanzan</i> Spreng.                             | Anacardiaceae    | 28.75  | 0.56   | 11.68  | 80   | 6250   | Good |
| <i>Pterocarpus marsupium</i> Roxb.                           | Fabaceae         | 22.50  | 0.86   | 11.59  | 3    | 4375   | Good |
| <i>Madhuca latifolia</i> (Roxb.) A.Chev.                     | Sapotaceae       | 23.75  | 0.68   | 10.90  | 33   | 6875   | Fair |
| Remaining species                                            |                  | 345.00 | 7.29   | 154.06 | 378  | 102500 |      |
| All species                                                  |                  | 756    | 21.69  | 300    | 1070 | 204375 |      |
| Sal Dominated Moist Deciduous Forest (Low disturbed)         |                  |        |        |        |      |        |      |
| <i>Shorea robusta</i> Roth                                   | Dipterocarpaceae | 235.00 | 9.05   | 90.43  | 575  | 45000  | Good |
| <i>Cleistanthus collinus</i> (Roxb.) Benth. ex Hook.f.       | Phyllanthaceae   | 47.50  | 1.00   | 17.58  | 30   | 2500   | Good |
| <i>Madhuca longifolia</i> (J.Koenig ex L.) J.F.Macbr.        | Sapotaceae       | 20.00  | 2.14   | 17.08  | 33   | 3125   | Fair |
| <i>Terminalia bellirica</i> (Gaertn.) Roxb.                  | Combretaceae     | 32.50  | 0.85   | 15.87  | 5    | 1250   | Fair |
| <i>Pterocarpus marsupium</i> Roxb.                           | Fabaceae         | 27.50  | 0.95   | 15.54  | 3    | 0      | Poor |
| Remaining species                                            |                  | 237.50 | 6.12   | 143.51 | 317  | 50625  | -    |
| All species                                                  |                  | 600    | 20.113 | 300    | 963  | 102500 | -    |
| Sal Dominated Moist Deciduous Forest (Moderately disturbed)  |                  |        |        |        |      |        |      |
| <i>Shorea robusta</i> Roth                                   | Dipterocarpaceae | 132.50 | 5.05   | 78.22  | 490  | 28750  | Good |
| <i>Schleichera oleosa</i> (Lour.) Oken                       | Sapindaceae      | 40.00  | 1.08   | 24.61  | 0    | 2500   | Fair |
| <i>Cleistanthus collinus</i> (Roxb.) Benth. ex Hook.f.       | Phyllanthaceae   | 45.00  | 0.63   | 21.79  | 15   | 1875   | Fair |
| <i>Macaranga peltata</i> (Roxb.) Müll.Arg.                   | Euphorbiaceae    | 27.50  | 0.57   | 17.62  | 0    | 0      | None |
| <i>Adina cordifolia</i> (Roxb.) Brandis                      | Rubiaceae        | 25.00  | 0.40   | 15.60  | 0    | 0      | None |
| Remaining species                                            |                  | 202.50 | 3.96   | 142.17 | 225  | 29375  |      |
| All species                                                  |                  | 473    | 11.68  | 300    | 730  | 62500  |      |
| Moist Deciduous Forest Without Sal (Un-disturbed)            |                  |        |        |        |      |        |      |
| <i>Terminalia alata</i> Heyne ex Roth                        | Combretaceae     | 47.50  | 2.32   | 16.87  | 50   | 16250  | Good |
| <i>Bridelia retusa</i> (L.) A.Juss.                          | Phyllanthaceae   | 45.00  | 2.20   | 15.24  | 58   | 8750   | Good |
| <i>Mitragyna parvifolia</i> (Roxb.) Korth.                   | Rubiaceae        | 27.50  | 2.30   | 14.40  | 28   | 8125   | Good |
| <i>Anogeissus latifolia</i> (DC.) Wallich ex Guill. et Perr. | Combretaceae     | 40.00  | 1.50   | 12.43  | 43   | 1875   | Good |
| <i>Diospyros melanoxylon</i> Roxb.                           | Ebenaceae        | 25.00  | 2.06   | 12.38  | 28   | 6250   | Good |
| Remaining species                                            |                  | 640.00 | 21.67  | 228.68 | 541  | 118125 |      |
| All species                                                  |                  | 825    | 32.06  | 300    | 748  | 159375 |      |
| Moist Deciduous Forest Without Sal (Moderately disturbed)    |                  |        |        |        |      |        |      |
| <i>Terminalia alata</i> Heyne ex Roth                        | Combretaceae     | 47.50  | 1.94   | 21.21  | 18   | 3125   | Fair |
| <i>Diospyros melanoxylon</i> Roxb.                           | Ebenaceae        | 35.00  | 1.88   | 19.07  | 30   | 5000   | Fair |
| <i>Anogeissus latifolia</i> (DC.) Wallich ex Guill. et Perr. | Combretaceae     | 47.50  | 1.30   | 18.34  | 23   | 1875   | Fair |

|                                               |             |        |       |        |     |        |      |
|-----------------------------------------------|-------------|--------|-------|--------|-----|--------|------|
| <i>Desmodium oojeinensis</i> (Roxb.) H.Ohashi | Fabaceae    | 37.50  | 1.72  | 17.39  | 3   | 625    | Fair |
| <i>Schleichera oleosa</i> (Lour.) Oken        | Sapindaceae | 32.50  | 1.32  | 16.16  | 28  | 4375   | Fair |
| Remaining species                             |             | 462.50 | 14.09 | 207.80 | 513 | 103750 | -    |
| All species                                   |             | 663    | 22.26 | 300    | 615 | 112500 | -    |
